# Supplementary material for: Modelled impact of virtual fractional flow reserve in patients undergoing coronary angiography (VIRTU-4)
Source: PubMed Central journal article supplement (PMC11287621; doi:10.1136/heartjnl-2024-324039), 2024-05-16
Supplement: heartjnl-2024-324039supp001.pdf [file heartjnl-2024-324039supp001.pdf]

**Population**

320 consecutive patients undergoing invasive angiography

112 with chronic coronary syndrome

208 with acute coronary syndrome

**Question**

Does vFFR, used as an adjunct to angiography, affect the management strategy, number of significant lesions suitable for intervention, and operator confidence?

**Comparison**

Angiography alone

versus

Angio + vFFR

FFR 1.00 0.95 0.90 0.85 0.80 0.75 0.70 0.65 0.60

FFR = 0.74

**Headline results**

More PCI (less OMT) in chronic stable cases

Increased operator confidence

Less PCI in ACS cases. Considerably less invasive FFR

Management strategy changed in 22% of cases.

| Category                 | CCS (n=112) | ACS (n=208) |
|--------------------------|-------------|-------------|
| Fewer lesions intervened | ~2%         | ~10%        |
| More lesions intervened  | ~12%        | ~6%         |
| Any change in management | ~22%        | ~19%        |
